# Supplementary material for: Human leukocyte antigen class II-based immune risk model for recurrence evaluation in stage I–III small cell lung cancer
Source: HighWire-hosted journal article supplement (doi:10.1136/jitc-2021-002554), 2021-08-01
Supplement: jitc-2021-002554supp003_data_supplement.pdf [file jitc-2021-002554supp003_data_supplement.pdf]

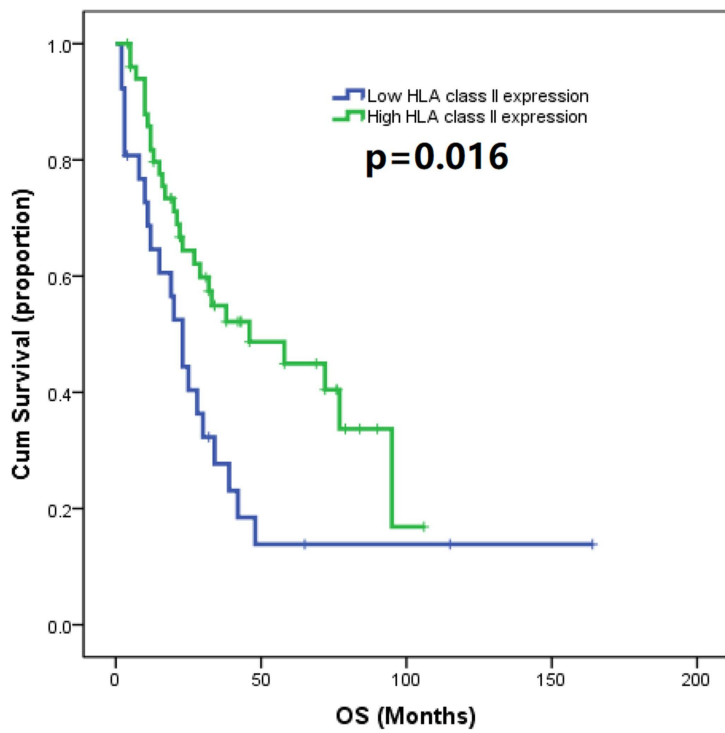

A) Survival analysis by HLA class II level in SCLC

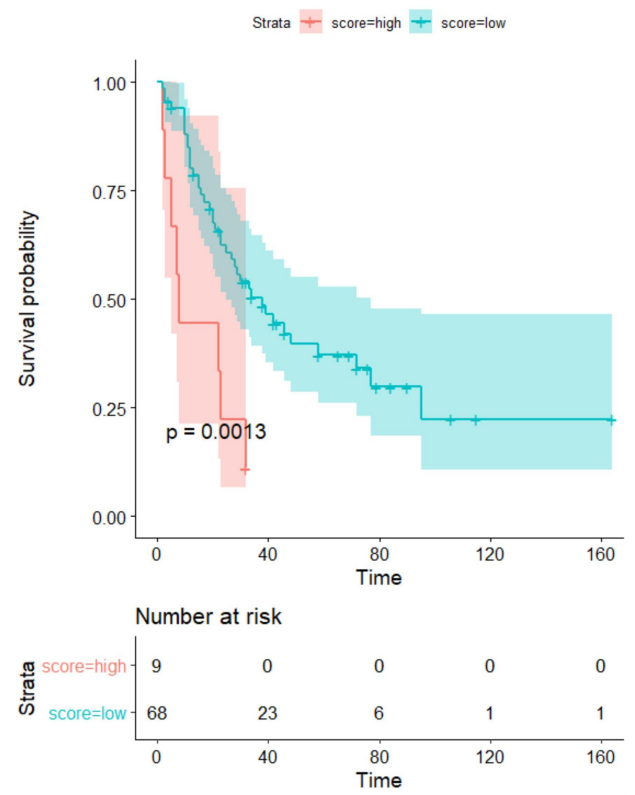

B) Survival analysis by immune risk score in SCLC
